# Supplementary material
Source: publisher figshare collection journal article supplement (https://acs.figshare.com/ndownloader/files/23425967)
Supplement: Supplementary file 1 [file 23425967]

## **SUPPORTING INFORMATION**

### **A Simple Two-Step Procedure for Synthesis of Memantine Hydrochloride from 1,3-Dimethyladamantane**

Binh Duong Vu,<sup>\*,†</sup> Ngoc Minh Ho Ba,<sup>†</sup> Van Hien Pham,<sup>†</sup> and Dinh Chau Phan<sup>\*,‡</sup>

<sup>†</sup> The Drug R&D Center, Vietnam Military Medical University, No.160, Phunghung Str.,  
Phucla ward, Hadong district, Hanoi, Vietnam

<sup>‡</sup> School of Chemical Engineering, Hanoi University of Science and Technology, No.1,  
Daicoviet Str., Bachkhoa ward, Haibatrung District., Hanoi, Vietnam

## TABLE OF CONTENTS

|                                                                                                                                          |    |
|------------------------------------------------------------------------------------------------------------------------------------------|----|
| 1. GENERAL PROCEDURE THE SYNTHESIS OF N-FORMYL-1-AMINO—3,5-DIMETHYLADAMANTANE (6).....                                                   | 3  |
| 1.1. Investigation for the effect of reaction parameters on the yield of N-formyl-1-amino-3,5-dimethyladamantane (6) .....               | 3  |
| 1.1.1. Effect of reaction Temperature on the yield of 6 .....                                                                            | 3  |
| 1.1.2. Effect of molar ratio between nitric acid and compound 2 on the yield of 6 .....                                                  | 3  |
| 1.1.3. Effect of molar ratio between formamide and compound 2 on the yield of 6 .....                                                    | 4  |
| 1.2. Experimental section .....                                                                                                          | 5  |
| 1.3. Analytical data (IR, MS, NMR) of N-formyl-1-amino-3,5-dimethyladamantane (6).....                                                   | 1  |
| 1.3.1. IR spectrum of N-formyl-1-amino-3,5-dimethyladamantane (6) .....                                                                  | 6  |
| 1.3.2. MS spectrum of N-formyl-1-amino-3,5-dimethyladamantane (6) .....                                                                  | 7  |
| 1.3.3. <sup>1</sup> H-NMR spectrum of N-formyl-1-amino-3,5-dimethyladamantane (6) .....                                                  | 8  |
| 1.3.4. <sup>13</sup> C-NMR spectrum of N-formyl-1-amino-3,5-dimethyladamantane (6) .....                                                 | 10 |
| 2.GENERAL PROCEDURE FOR THE SYNTHESIS OF MEMANTINE HYDROCHLORIDE (1) .....                                                               | 11 |
| 2.1. Effect of reaction parameters on the synthesis of memantine hydrochloride (1) from N-formyl-1-amino-3,5-dimethyladamantane (6)..... | 11 |
| 2.1.1. Effect of solvent type on the yield of memantine hydrochloride (1).....                                                           | 11 |
| 2.1.2. Effect of reaction time on the yield of memantine hydrochloride (1) .....                                                         | 12 |
| 2.1.3. Effect of molar ratio between HCl and compound 6 on the yield of memantine hydrochloride(1).....                                  | 12 |
| 2.1.4. Effect of solvent volume on the yield of memantine hydrochloride (1).....                                                         | 13 |
| 2.2. Experimental section .....                                                                                                          | 15 |
| 2.3. Analytical data (IR, MS, NMR) of Memantine Hydrochloride .....                                                                      | 16 |
| 2.3.1. IR spectrum of Memantine Hydrochloride .....                                                                                      | 16 |
| 2.3.2. MS spectrum of Memantine Hydrochloride .....                                                                                      | 17 |
| 2.3.3. <sup>1</sup> H-NMR spectrum of Memantine Hydrochloride .....                                                                      | 18 |
| 2.3.4. <sup>13</sup> C-NMR spectrum of Memantine Hydrochloride .....                                                                     | 19 |
| 3. THE SAFETY STUDIES.....                                                                                                               | 20 |

## 1. GENERAL PROCEDURE THE SYNTHESIS OF N-FORMYL-1-AMINO—3,5-DIMETHYLADAMANTANE (6)

### 1.1. Investigation for the effect of reaction parameters on the yield of N-formyl-1-amino-3,5-dimethyladamantane (6)

#### 1.1.1. Effect of reaction temperature on the yield of 6

In a round-bottom flask, at 20-25 °C 1,3-dimethyl-adamantane (2 mL, 0.01 mol) was slowly added to nitric acid (10.65 mL, 0.25 mol) over 20 min with stirring at this temperature over 1 h, then formamide (11 mL, 0.27 mol) was slowly added within 0.5 h followed by heating the mixture to 75 °C for 3.5 h. After the reaction was finished, the solution was cooled to 5-10 °C and added to ice-cold water (20 mL), the reaction mixture was extracted with dichloromethane (40 mL). The separated organic layer was adjusted to pH 8-9 with 10% NaOH solution and then washed with chilled water, the organic layer was dried over Na<sub>2</sub>SO<sub>4</sub>, and then the solvent was evaporated to dryness in vacuum to give N-formyl-1-amino-3,5-dimethyl-adamantane (1.54 g, 77.44%) as an oil, which crystallized to a white solid at 10-15 °C, m.p. 60-64 °C. The reaction above preparation of **6** was performed the same operation as 2.1.1, but reaction temperature 75 °C instead of 60, 70, 75, 80, 85, 90 °C, respectively. (Table S1)

**Table S1.** Effect of reaction temperature and reaction time on the yield of N-formyl-1-amino-3,5-dimethyladamantane (6)

| No.      | Temperature (°C) | Reaction Time (h) | Compound 6  |              |              |
|----------|------------------|-------------------|-------------|--------------|--------------|
|          |                  |                   | Weight (g)  | Mp (°C)      | Yield (%)    |
| 1        | 60               | 7                 | 1.24        | 60-65        | 59.64        |
| 2        | 70               | 5                 | 1.45        | 61-66        | 69.76        |
| 3        | 75               | 3.5               | 1.54        | 62-66        | 77.44        |
| 4        | 80               | 3.0               | 1.78        | 60-67        | 85.65        |
| <b>5</b> | <b>85</b>        | <b>2.0</b>        | <b>1.82</b> | <b>63-65</b> | <b>87.58</b> |
| 6        | 90               | 2                 | 1.81        | 60-66        | 87.13        |

**Other reaction parameters.** 1,3-Dimethyl-adamantane (**2**) = 0.01 mol; Reaction temperature: 60 °C, 70 °C, 75 °C, 80 °C, 85 °C, 90 °C; molar ratio of (compound **2**: nitric acid : formamide) = (1:12.5:13.5).

**Conclusion:** The reaction temperature gives the best yield of **6** was 85 °C for 2.5 h (the yield 87.58%) (No.5, Table S1).

#### 1.1.2. Effect of molar ratio between nitric acid and compound 2 on the yield of 6

**Experiment:** The reaction preparation of **6** was performed the same operation as 1.1.1, but the molar ratio between nitric acid and compound **6** was 7.5:1; 9:1; 10:1; 11.5:1, respectively. (Table S2)

**Table S2.** Effect of molar ratio between nitric acid and compound 2 on the yield of N-formyl-1-amino-3,5-dimethyladamantane (6)

| No.      | HNO <sub>3</sub><br>ml (mol) | Molar ratio of<br>HNO <sub>3</sub> : 2 | Compound 6    |              |              |
|----------|------------------------------|----------------------------------------|---------------|--------------|--------------|
|          |                              |                                        | Weight<br>(g) | Mp<br>(°C)   | Yield<br>(%) |
| 1        | 3.2 (0.075)                  | 7.5:1                                  | 1.73          | 60-64        | 83.65        |
| 2        | 3.7 (0.09)                   | 9:1                                    | 1.81          | 62-66        | 87.56        |
| <b>3</b> | <b>4.2 (0.10)</b>            | <b>10:1</b>                            | <b>1.91</b>   | <b>63-66</b> | <b>92.10</b> |
| 4        | 4.8 (0.113)                  | 11.5:1                                 | 1.90          | 62-67        | 91.74        |

**Other reaction parameters.** Reaction temperature = 85 °C; Reaction time = 2.5 h;

**Conclusion:** The result found that using molar ratio of nitric acid:compound 2 was 10:1 got the highest yield of 6 was 92.10% (No.3, Table S2)

### 1.1.3. Effect of molar ratio between formamide and compound 2 on the yield of 6

**Experiment:** The reaction preparation of 6 was performed the same operation as 1.1.2, but the molar ratio between nitric acid and compound 6 was 20:1 and molar ratio between formamide and compound 2 was 5:1; 7.5:1; 9:1; 10:1, respectively. (Table S3)

**Table S3.** Effect of molar ratio between formamide and compound 2 on the yield of N-formyl-1-amino-3,5-dimethyladamantane (6)

| No.      | Formamide<br>ml (mol) | Molar ratio of<br>Formamide:2 | Compound 6    |              |              |
|----------|-----------------------|-------------------------------|---------------|--------------|--------------|
|          |                       |                               | Weight<br>(g) | Mp<br>(°C)   | Yield<br>(%) |
| 1        | 2.10 (0.05)           | 5:1                           | 1.80          | 60-64        | 86.96        |
| 2        | 3.15 (0.075)          | 7.5:1                         | 1.95          | 62-66        | 94.20        |
| <b>3</b> | <b>3.65 (0.09)</b>    | <b>9:1</b>                    | <b>2.02</b>   | <b>63-66</b> | <b>97.58</b> |
| 4        | 4.25 (0.10)           | 10:1                          | 1.99          | 62-67        | 96.14        |

**Other reaction parameters.** Reaction temperature = 85 °C; Reaction time = 2.5 h;

**Conclusion:** The result found that using molar ratio of formamide:compound 2 was 9:1 got the highest yield = 97.58% (No.3, Table S3)

⇒ **Results.** The combination of reaction parameters found that the highest yield of N-formyl-1-amino-3,5-dimethyl adamantane were followed: 1,3-Dimethyladamantane (2) = 0.01 mol; Reaction condition: Reaction temperature = 85°C; Reaction time = 2.0 h; Molar ratio of (nitric acid:formamide:1,3-dimethyladamantane) = (10:9:1); Yield = 97.58%.

## 1.2. Experimental section

### *Synthesis of N-formyl-1-amino-3,5-dimethyladamantane (6)*

In a round-bottom flask, at 20-25 °C 1,3-dimethyladamantane (11.13 mL, 9.86 g, 0.06 mol) was slowly added to nitric acid (25.25 mL, 0.6 mol) over 20 min with stirring at this temperature for 1 h, then formamide (22.5 mL, 0.54 mol) was added within 0.5 h followed by heating the mixture to 85 °C for 2 h. After reaction completion, the solution was cooled to 5-10 °C and added to ice-cold water (120 mL), the reaction mixture was extracted with dichloromethane (150 mL). The separated organic layer was adjusted to pH 8-9 with 10% NaOH solution and then washed with chilled water, the organic layer was dried over Na<sub>2</sub>SO<sub>4</sub>, and the solvent was evaporated to dryness in vacuum to give N-formyl-1-amino-3,5-dimethyladamantane (12.18 g, 97.91%) as an oil, which crystallized into white solid at 10-15 °C, m.p. 60-64 °C. IR (KBr), (cm<sup>-1</sup>): 3450-3199 (N-H); 2947-2847 (C-H); 1693,50 (C=O). MS (m/z): 208.16[M+1]<sup>+</sup>. <sup>1</sup>H-NMR (500 MHz, CDCl<sub>3</sub>),  $\delta$  (ppm): 8.23 (d, J=12.5 Hz, 1H, NH) 7.99 (s, 1H, CHO); 6.23 and 5.25 (br, s, 1H); 2.12-2.17 (m, 1H); 1.83 (s, 1H); 1.67-1.61 (m, 2H); 1.48-1.40 (m, 2H); 1.37-1.25 (m, 4H); 1.17-1.12 (m, 2H); 0.85-0.83 (m, 6H, 2CH<sub>3</sub>). <sup>13</sup>C-NMR (125 MHz, CDCl<sub>3</sub>),  $\delta$  (ppm): 162.3/160.3 (CHO); 53.7/52.3 (C<sub>1</sub>) 50.5-50,3 (2C, C<sub>2</sub> and C<sub>9</sub>); 47.8 (C<sub>4</sub>); 42.7/42.5 (C<sub>6</sub>); 42.2 (C<sub>10</sub>); 40.4 (C<sub>7</sub>); 32.5-32.4 (2C, C<sub>3</sub> and C<sub>5</sub>); 30.1/30.0 (C<sub>8</sub>); 29.9 (C<sub>11</sub>); 29.8 (C<sub>12</sub>).

### 1.3. Analytical data (IR, MS, NMR) of N-formyl-1-amino-3,5-dimethyladamantane (6)

#### 1.3.1. IR spectrum of N-formyl-1-amino-3,5-dimethyladamantane (6)

IR (KBr), ( $\text{cm}^{-1}$ ): 3450-3199 (N-H); 2947-2847 (C-H); 1693,50 (C=O).

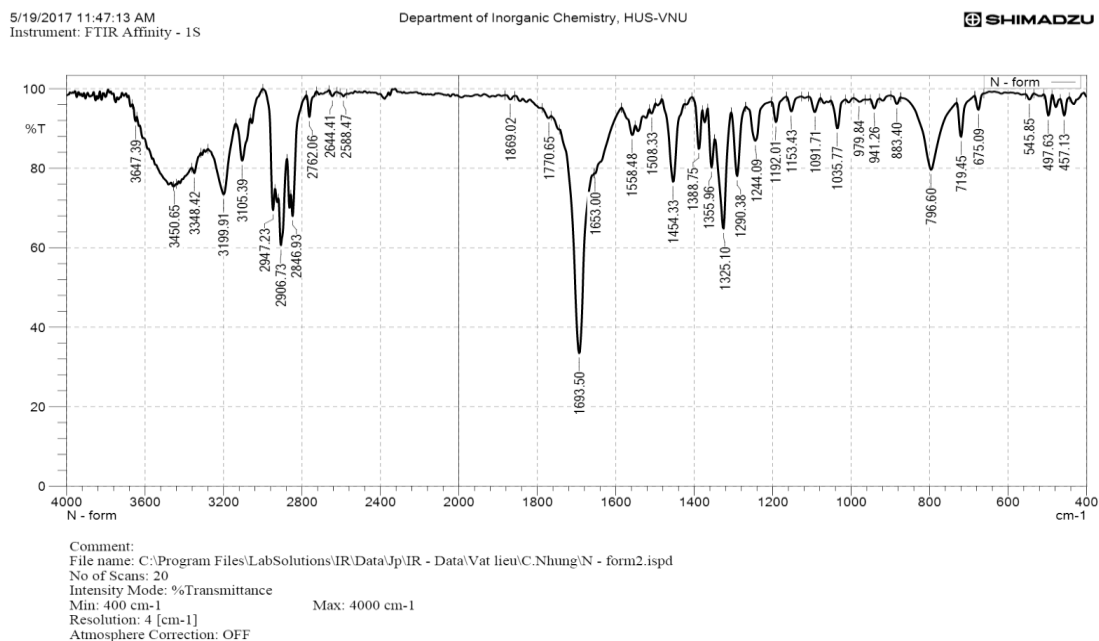

Figure S1. IR spectrum 6.

### 1.3.2. MS spectrum of *N*-formyl-1-amino-3,5-dimethyladamantane (6)

MS (m/z): 208.16 [M+1]<sup>+</sup>

Lab: Materials chemistry, Faculty of Chemistry, HUS-VNU  
19 Le Thanh Tong, Hoan Kiem, Ha Noi  
Tel: 844 38 253 053; Fax: 844 38 241 140 Mail: [Chem.vnu@edu.vn](mailto:Chem.vnu@edu.vn)  
C:\LTQ Orbitrap\NFORM\_170518112510  
MEOH  
NFORM\_170518112510 #647 RT: 7.93 AV: 1 NL: 6.09E6  
T: ITMS - c ESI Full ms (150.00-2000.00)

File name: NFORM  
Solvent: MEOH  
MODE: ESI, M+H...

Mass Spectrometer  
**LTQ Orbitrap XL**<sup>TM</sup>  
Thermo SCIENTIFIC company  
Resolution: >60 000 Da  
Sensitivity: 10<sup>-14</sup>  
Tandem: n >= 15  
Mass Accuracy: <= 10ppm

Operator: Ms. Dao Thi Nhung  
Mobile: 0948 119 043  
Email: [daothinhung@yahoo.com](mailto:daothinhung@yahoo.com)

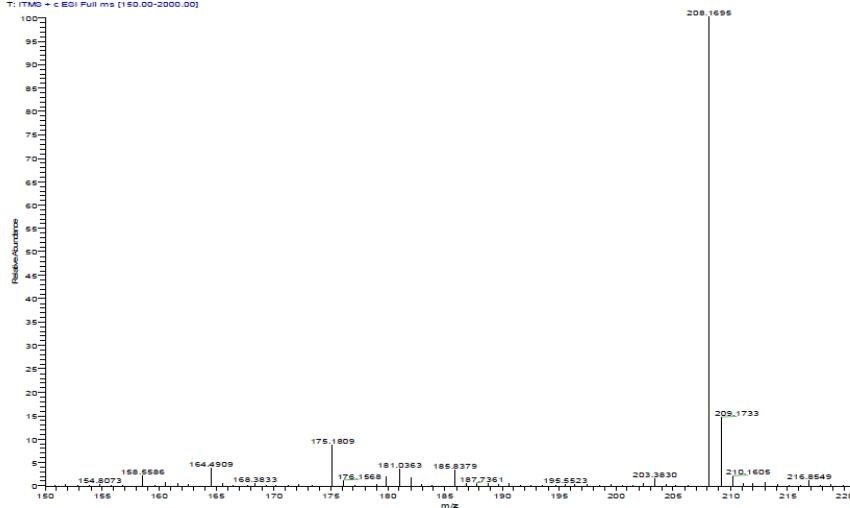

Figure S2. MS spectrum of 6.

### 1.3.3. <sup>1</sup>H-NMR spectrum of *N*-formyl-1-amino-3,5-dimethyladamantane (6)

**<sup>1</sup>H-NMR** (500 MHz, CDCl<sub>3</sub>), δ (ppm): 8.23 (d, J=12.5 Hz, 1H, NH) 7.99 (s, 1H, CH<sub>2</sub>O); 6.23 and 5.25 (br, s, 1H); 2.12-2.17 (m, 1H); 1.83 (s, 1H); 1.67-1.61 (m, 2H); 1.48-1.40 (m, 2H); 1.37-1.25 (m, 4H); 1.17-1.12 (m, 2H); 0.85-0.83 (m, 6H, 2CH<sub>3</sub>).

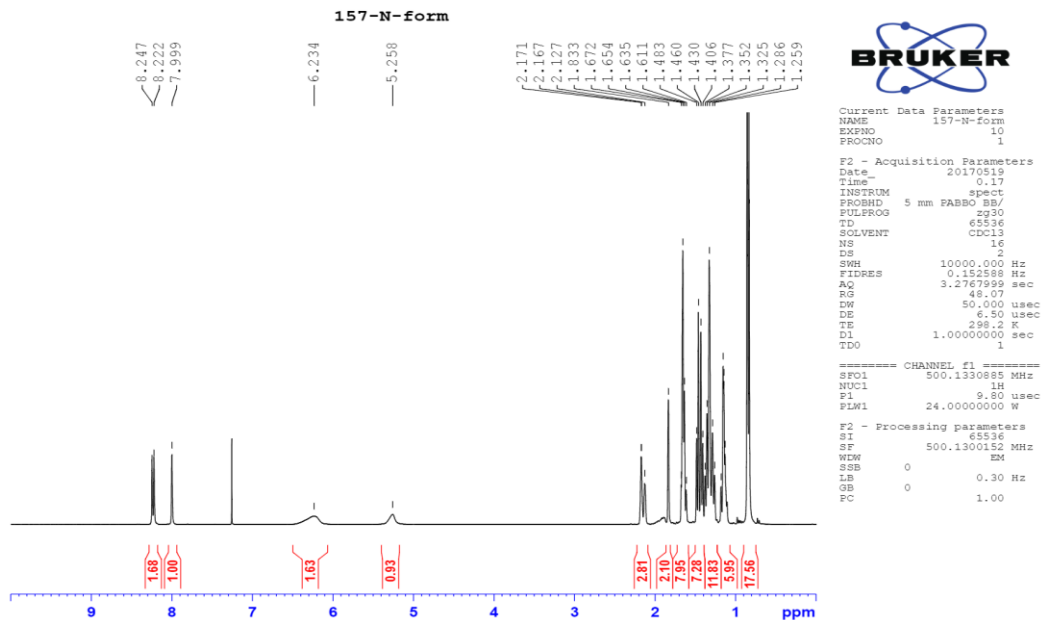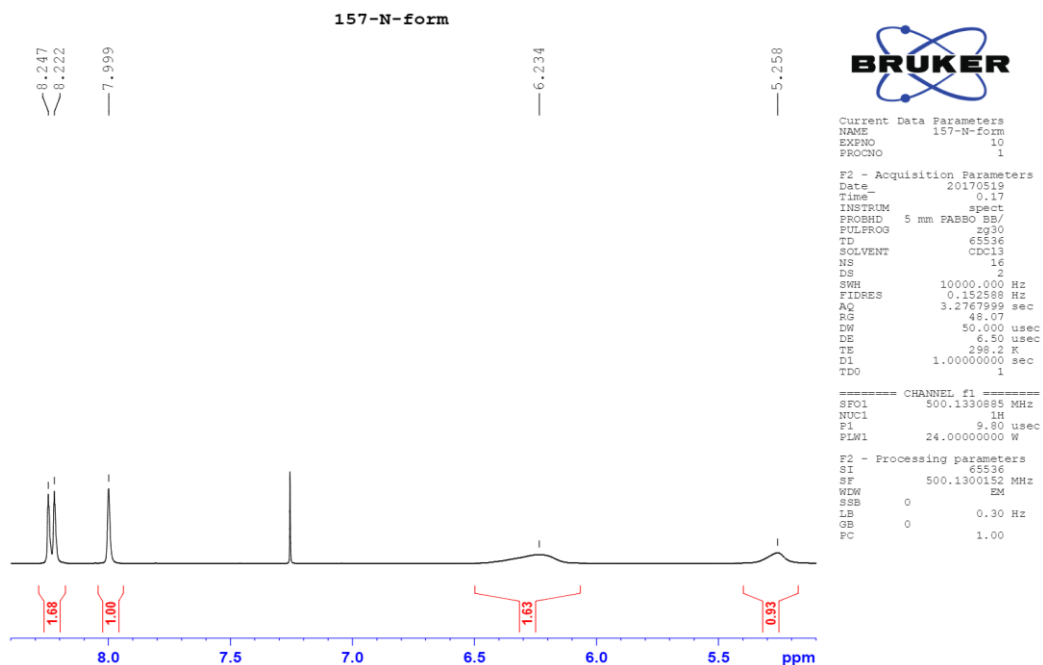



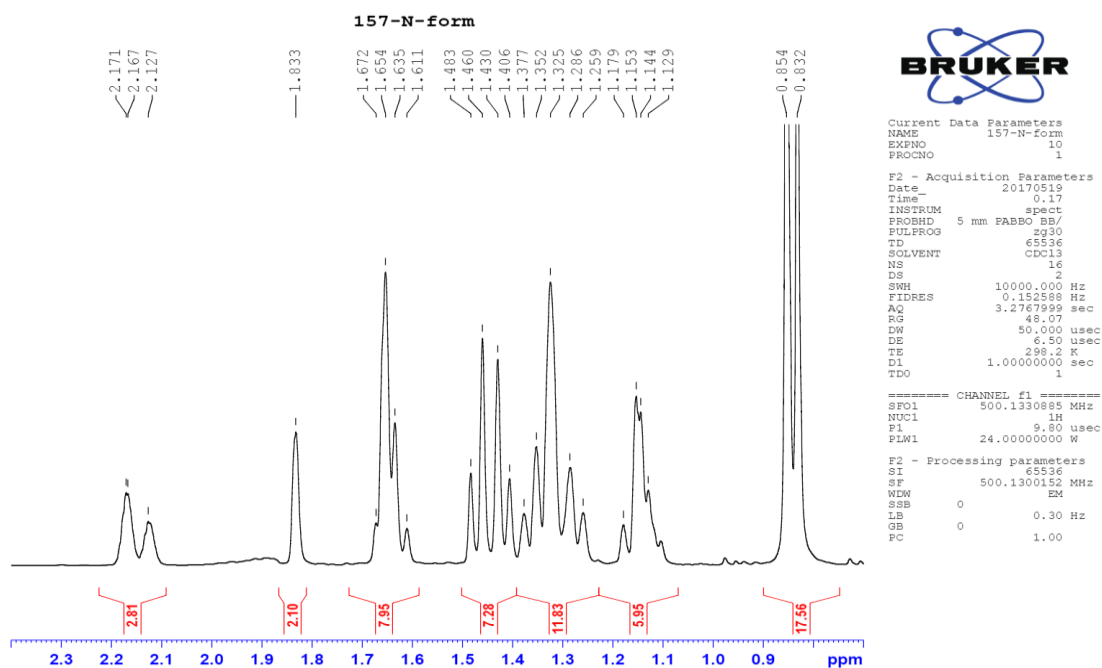

**Figure S3.**  $^1\text{H}$ -NMR spectrum of **6**.

### 1.3.4. $^{13}\text{C}$ -NMR spectrum of *N*-formyl-1-amino-3,5-dimethyladamantane (6)

$^{13}\text{C}$ -NMR (125 MHz,  $\text{CDCl}_3$ ),  $\delta$  (ppm): 162.3/160.3( $\underline{\text{CHO}}$ ); 53.7/52.3( $\text{C}_1$ ) 50.5-50.3( $2\text{C}$ ,  $\text{C}_2$  and  $\text{C}_9$ ); 47.8 ( $\text{C}_4$ ); 42.7/42.5( $\text{C}_6$ ); 42.2( $\text{C}_{10}$ ); 40.4 ( $\text{C}_7$ ); 32.5-32.4 ( $2\text{C}$ ,  $\text{C}_3$  and  $\text{C}_5$ ); 30.1/30.0 ( $\text{C}_8$ ); 29.9 ( $\text{C}_{11}$ ); 29.8 ( $\text{C}_{12}$ ).

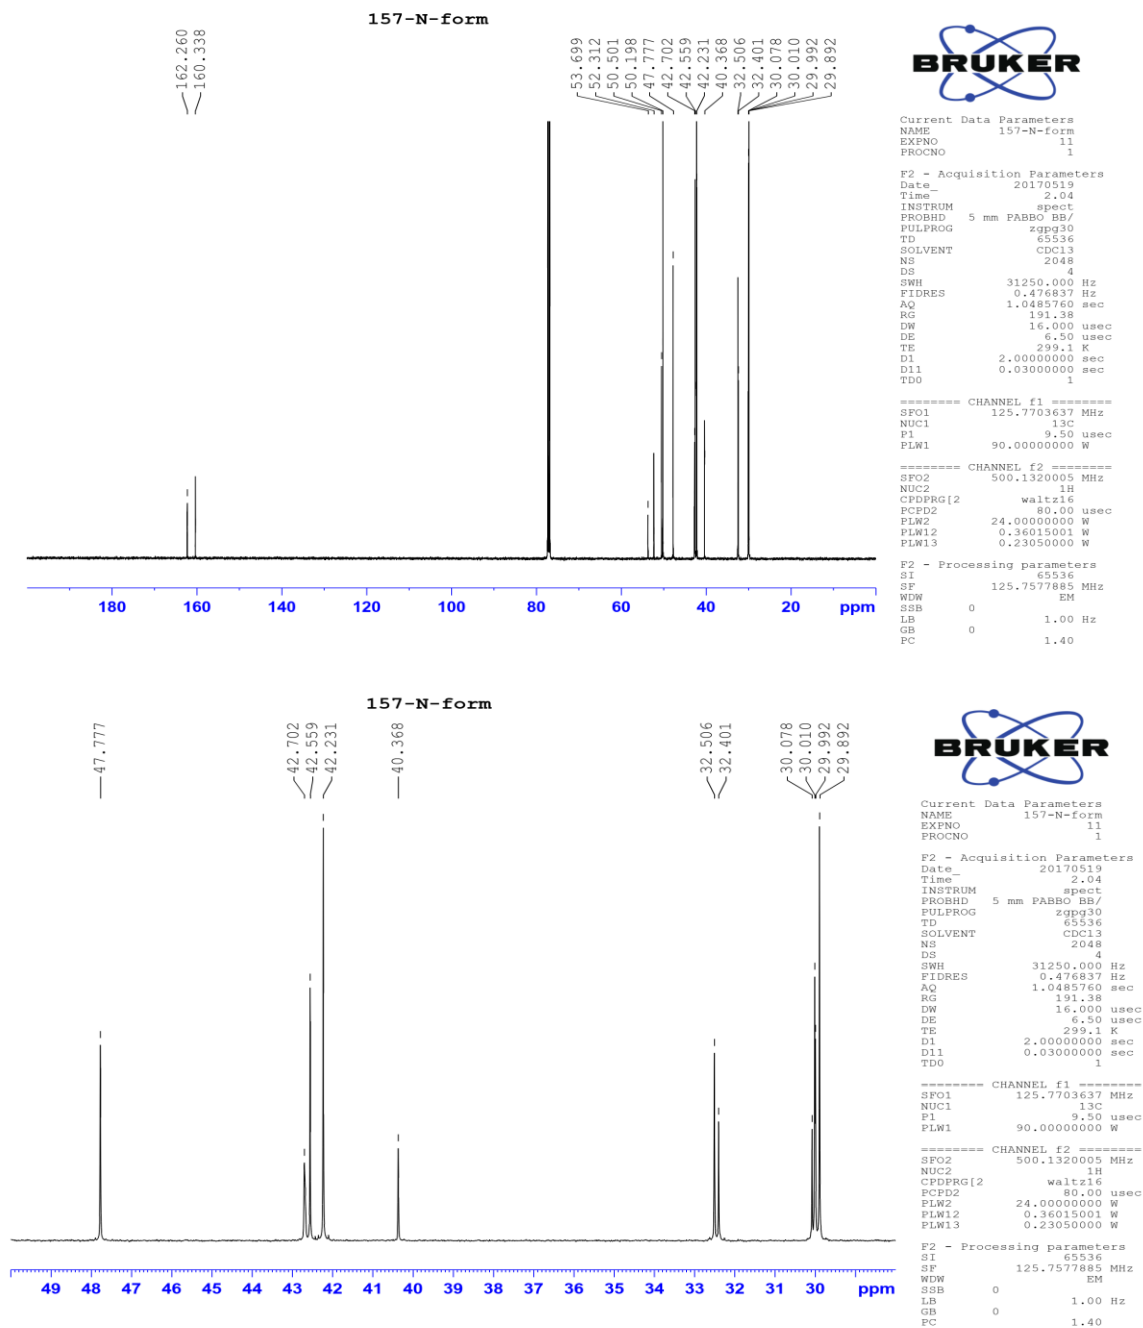

Figure S4.  $^{13}\text{C}$ -NMR spectrum of 6.

## 2.GENERAL PROCEDURE FOR THE SYNTHESIS OF MEMANTINE HYDROCHLORIDE (1)

**2.1.Effect of reaction parameters on the synthesis of memantine hydrochloride (1) from N-formyl-1-amino-3,5-dimethyladamantane(6)**

### *2.1.1. Effect of solvent type on the yield of memantine hydrochloride (1)*

*Experiment:* In a round-bottom flask, a mixture 18 mL water, 36% hydrochloride solutions (21 mL, 0.24 mol) and N-formyl-1-amino-3,5-dimethyl adamantane (**6**) (6.55 g, 0.03 mol) was stirred for 10 min, and then was heated to reflux until the reaction was finished off (the compound **6** was consumed). The reaction mixture was concentrated to a half volume of solvent under vacuum. To this solution, n-hexane (10 mL) was added, the reaction mixture was heated to reflux for 0.5 h. The reaction was cooled to 5-10 °C for 1 h, whereupon a white solid was separated. The solid was filtered and washed with cooled ethyl acetate to obtain a white solid, which was further recrystallized from a mixture of ethanol and ethyl acetate and dried under vacuum to give memantine hydrochloride (**1**), which was melted at 290 °C and sublimated at 300 °C (**Table S4**)

**Table S4.** *Effect of solvent type on the yield of memantine hydrochloride(1)*

| No. | Solvent type (ml)                         | Reaction Temperature/<br>reaction time<br>(°C/h) | Memantine hydrochloride(1) |              |           |
|-----|-------------------------------------------|--------------------------------------------------|----------------------------|--------------|-----------|
|     |                                           |                                                  | Weight (g)                 | Mp & Sp (°C) | Yield (%) |
| 1   | H <sub>2</sub> O (18)                     | 100-103/1                                        | 5.19                       | 290-300      | 80.45     |
| 2   | 95% C <sub>2</sub> H <sub>5</sub> OH (18) | 80-85/3                                          | 4.83                       | 290-300      | 74.56     |
| 3   | CH <sub>3</sub> OH (18)                   | 70-75/2.5                                        | 4.68                       | 290-300      | 72.47     |

**Other reaction parameters.** 36% HCl; Molar ratio of (HCl:compound **6**) = (8:1).

**Conclusion:** The result found that using water as a solvent got the highest yield (No.1, **Table S4**)

### 2.1.2. Effect of reaction time on the yield of memantine hydrochloride (1)

*Experiment:* The reaction preparation of **1** was performed the same operation as 2.1.1, but reaction temperature 75, 80, 90, 100, and reaction time was 2.5, 2, 1.5, 1 h, respectively. (Table S5)

**Table S5.** Effect of reaction time on the yield of memantine hydrochloride (1)

| No. | Reaction time (°C) | Reaction time (h) | Memantine hydrochloride(1) |              |           |
|-----|--------------------|-------------------|----------------------------|--------------|-----------|
|     |                    |                   | Weight (g)                 | Mp & Sp (°C) | Yield (%) |
| 1   | 75                 | 2.5               | 5.10                       | 290-300      | 78.81     |
| 2   | 80                 | 2.0               | 5.13                       | 290-300      | 79.15     |
| 3   | 90                 | 1.5               | 5.16                       | 290-300      | 79.93     |
| 4   | 100                | 1.0               | 5.22                       | 290-301      | 80.58     |

**Other reaction parameters.** Solvent = water. Molar ratio of (HCl:compound **6**) = (8:1).

**Conclusion:** The reaction temperature gives the best yield of **1** was 100 °C for 1 h (No.4, Table S5).

### 2.1.3. Effect of molar ratio between HCl and compound 6 on the yield of memantine hydrochloride (1)

*Experiment:* The reaction preparation of **1** was performed the same operation as 2.1.2, but molar ratio between HCl and compound **6** was 6:1, 7.2:1, 8.4:1, 9.6:1, 10.8:1, respectively. (Table S6)

**Table S6.** Effect of molar ratio between HCl and compound 6 on the yield of memantine hydrochloride (1)

| No. | HCl 36% ml (mol) | Molar ratio of HCl:6 | Memantine hydrochloride(1) |              |           |
|-----|------------------|----------------------|----------------------------|--------------|-----------|
|     |                  |                      | Weight (g)                 | Mp & Sp (°C) | Yield (%) |
| 1   | 15(0.180)        | 6.0:1                | 5.22                       | 290-300      | 80.45     |
| 2   | 18(0.216)        | 7.2:1                | 5.37                       | 290-300      | 82.98     |

|          |                  |              |             |                |              |
|----------|------------------|--------------|-------------|----------------|--------------|
| <b>3</b> | <b>21(0.252)</b> | <b>8.4:1</b> | <b>5.43</b> | <b>290-300</b> | <b>83.57</b> |
| 4        | 24(0.288)        | 9.6:1        | 5.34        | 290-300        | 82.52        |
| 5        | 27(0.324)        | 10.8:1       | 5.16        | 290-300        | 79.74        |

**Other reaction parameters.** Solvent = water. Molar ratio of (HCl:compound **6**) = (6:1, 7.2:1, 8.4:1, 9.6:1 and 10.8:1).

**Conclusion:** The molar ratio between HCl and compound **6** gives the best yield of **1** was 8.4:1 (see No.4 in **Table S6**).

#### **2.1.4. Effect of solvent volume on the yield of memantine hydrochloride(1)**

*Experiment:* The reaction preparation of **1** was performed the same operation as 2.1.3, but solvent (water) volume was 6, 9, 12, 15, 18, 21, 24 mL, respectively. (**Table S7**)

**Table S7.** Effect of solvent volume on the yield of memantine hydrochloride (**1**)

| No.      | Water volume (ml) | HCl concentration N | Memantine hydrochloride(1) |                |              |
|----------|-------------------|---------------------|----------------------------|----------------|--------------|
|          |                   |                     | Weight (g)                 | Mp & Sp (°C)   | Yield (%)    |
| 1        | 6                 | 10.50               | 5.22                       | 290-300        | 80.25        |
| 2        | 9                 | 9.33                | 5.30                       | 290-300        | 81.86        |
| 3        | 12                | 8.40                | 5.37                       | 290-300        | 82.98        |
| 4        | 15                | 7.64                | 5.43                       | 290-300        | 83.87        |
| <b>5</b> | <b>18</b>         | <b>6.46</b>         | <b>5.49</b>                | <b>290-300</b> | <b>84.85</b> |
| 6        | 21                | 6.0                 | 5.47                       | 290-300        | 84.46        |
| 7        | 24                | 5.5                 | 5.36                       | 290-300        | 82.75        |

**Other reaction parameters.** Solvent = water. Reaction time = 1h. Molar ratio of (HCl : compound **6**) = (8.4:1).

**Conclusion:** The solvent (water) volume gives the best yield of **1** was 18 ml (No.5, **Table S7**)

⇒ **Results.** The optimal parameters of reaction for the highest yield of memantine hydrochloride were followed: Compound **6** (0.03 mol); 36% HCl (25 ml, 0.288 mol); Molar ratio of (HCl:compound **6**) = (8.4:1); water (18 mL); Temperature = 100-104 °C; Reaction time = 1.0 h.

## 2.2. Experimental section

In a round-bottom flask, a mixture of water (36 mL), solution of 36% hydrochloride (45 mL, 0.51 mol) and N-formyl-1-amino-3,5-dimethyladamantane (12.44 g, 0.06 mol) were stirred for 10 min, followed by heating to reflux for 1 h. The reaction mixture was concentrated to half volume of the solvent under vacuum. To this solution, n-hexane (20 mL) was added, the reaction mixture was heated to reflux for 0.5 h. The reaction was cooled to 5-10 °C for 1 h, whereupon a white solid was separated. The solid was filtered and washed with cooled ethyl acetate to obtain a white solid, which was further recrystallized from a mixture of ethanol and ethyl acetate (5:4, v/v) and dried under vacuum to give memantine hydrochloride (**1**) (10.97 g, 84.74%), which was melted at 290 °C and sublimated at 300 °C (literature<sup>17</sup> m.p. 290-295 °C). IR (KBr), (cm<sup>-1</sup>): 3441 (N-H); 2943, 2901 (CH); 1364 (C-N); MS, m/z: 180.17 [M-HCl+1]<sup>+</sup>. <sup>1</sup>H-NMR (500 MHz, CDCl<sub>3</sub>),  $\delta$  (ppm): 8.34 (s, 3H, NH<sub>2</sub>.HCl); 2.20 (m, 1H); 1.89 (s, 2H); 1.74 (d, J=11.5, 2H); 1.68 (d, J=11.5, 2H); 1.42 (d, J=12.5, 2H); 1.31 (d, J=12.5 2H); 1.22 (d, J=12.5Hz, 1H); 1.16 (d, J=12.5Hz, 1H); 0.86 (s, 6H, 2CH<sub>3</sub>). <sup>13</sup>C-NMR (125 MHz, CDCl<sub>3</sub>),  $\delta$  (ppm): 54.4 (C<sub>1</sub>); 49.8 (2C, C<sub>2</sub> and C<sub>9</sub>); 46.4 (C<sub>4</sub>); 41.8 (2C, C<sub>6</sub> and C<sub>10</sub>); 39.2 (C<sub>7</sub>); 32.6 (C<sub>3</sub> and C<sub>5</sub>); 29.8 (C<sub>8</sub>); 29.6 (2C, C<sub>11</sub> and C<sub>12</sub>).

## 2.3. Analytical data (IR, MS, NMR) of Memantine Hydrochloride

### 2.3.1. IR spectrum of Memantine Hydrochloride

IR (KBr), ( $\text{cm}^{-1}$ ): 3406 (N-H); 2988, 2901 (CH); 1361 (C-N);

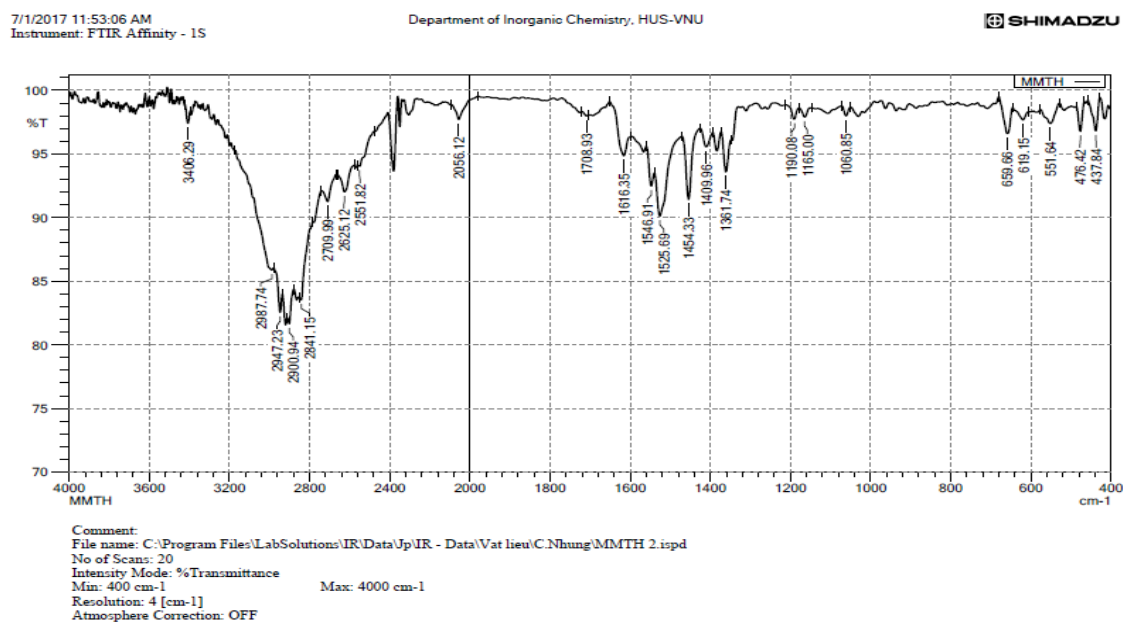

Figure S5. IR spectrum of Memantine Hydrochloride.



### 2.3.2. MS spectrum of Memantine Hydrochloride

MS, m/z: 180.17 [M- HCl+1]<sup>+</sup>

Lab: Materials chemistry, Faculty of Chemistry, HUS-VNU  
19 Le Thanh Tong, Hoan Kiem, Ha Noi  
Tel: 844.38.253.053; Fax: 844.38.241.140 Mail: [Chem.vnu@edu.vn](mailto:Chem.vnu@edu.vn)  
C:\LTQ Orbitrap\...IT4\MMTH\_170516082852  
MEOH  
MMTH\_170516082852 #8 RT: 0.01 AC: 1 NL: 4.93E7  
T: ITMS - c ESI Full ms (95.00-160.00)

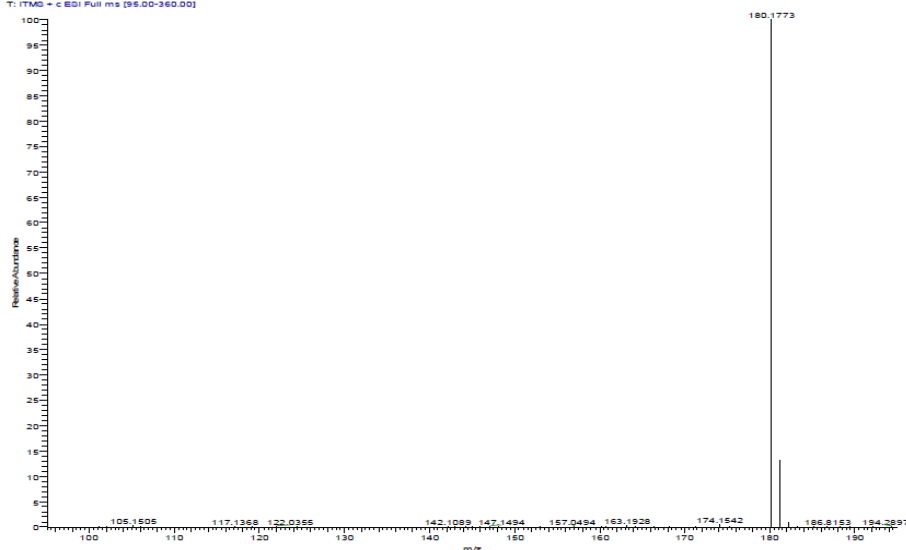

File name: MMTH  
Solvent: MEOH  
MODE: ESI M+H

Mass Spectrometer  
**LTQ Orbitrap XL™**  
Thermo SCIENTIFIC company

Resolution: >60 000 Da  
Sensitivity: 10<sup>-14</sup>  
Tandem: n >= 15  
Mass Accuracy: <= 10ppm

Operator: Ms. Dao Thi Nhung  
Mobile: 0948 119 043  
Email: [daothinhung@yahoo.com](mailto:daothinhung@yahoo.com)

Figure S6. MS spectrum of Memantine Hydrochloride.

### 2.3.3. <sup>1</sup>H-NMR spectrum of Memantine Hydrochloride

<sup>1</sup>H-NMR (500 MHz, CDCl<sub>3</sub>), δ (ppm): 8.34 (s, 3H, NH<sub>2</sub>·HCl); 2.20 (m, 1H, C<sub>7</sub>-H); 1.89 (s, 2H); 1.74 (d, J=11.5, 2H); 1.68 (d, J=11.5, 2H); 1.42 (d, J=12.5, 2H); 1.31 (d, J=12.5, 2H); 1.22 (d, J=12.5Hz, 1H); 1.16 (d, J=12.5Hz, 1H); 0.86 (s, 6H, 2CH<sub>3</sub>)

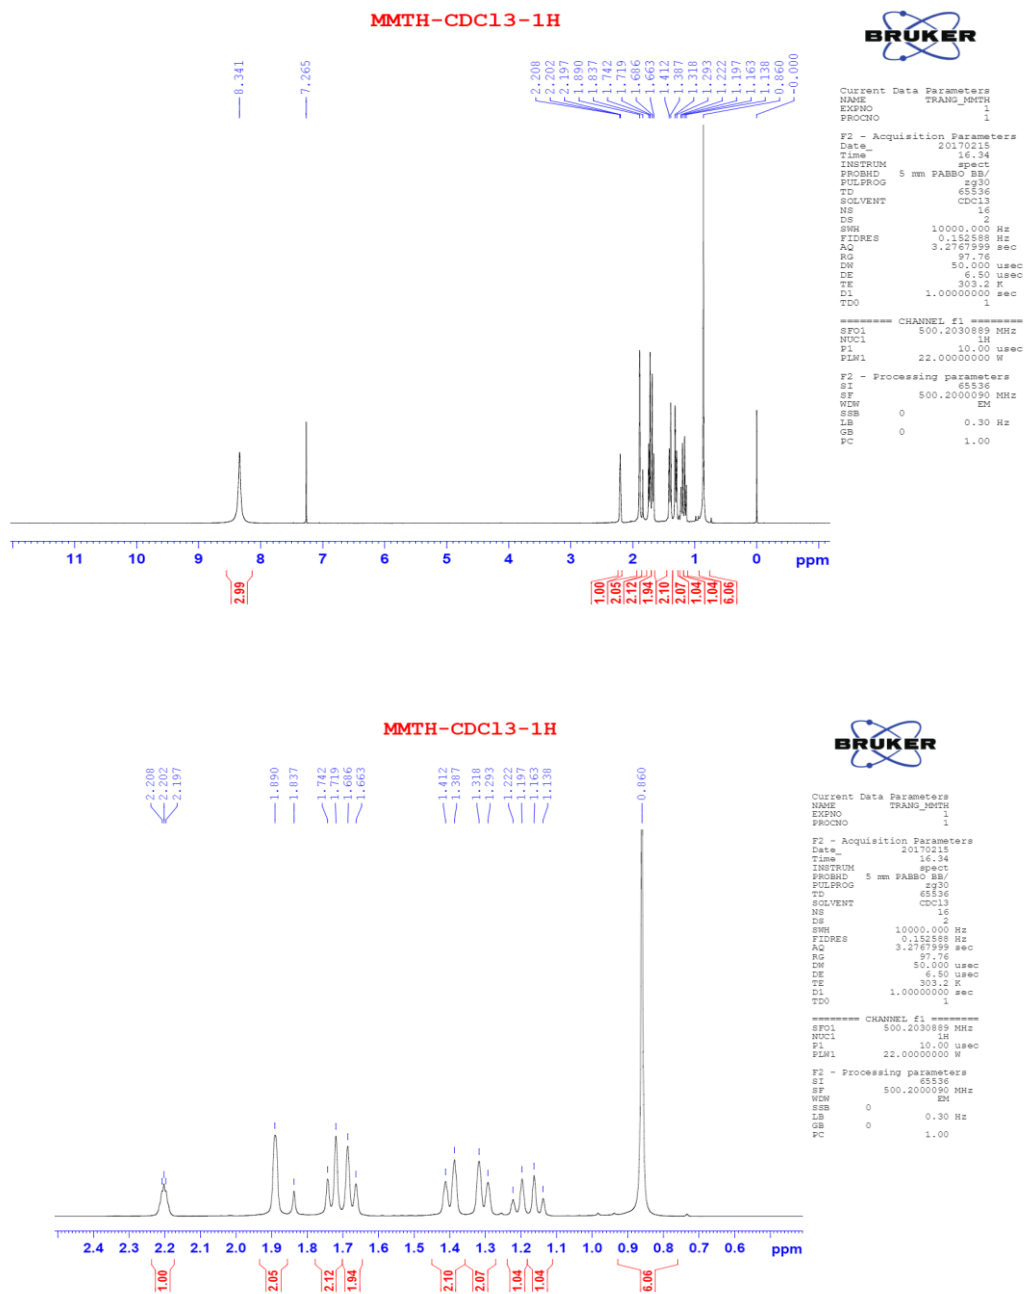

**Figure S7.** <sup>1</sup>H-NMR spectrum of Memantine Hydrochloride

### 2.3.4. $^{13}\text{C}$ -NMR spectrum of Memantine Hydrochloride

$^{13}\text{C}$ -NMR (125 MHz,  $\text{CDCl}_3$ ),  $\delta$  (ppm): 54.4 ( $\text{C}_1$ ); 49.8 (2C,  $\text{C}_2$  and  $\text{C}_9$ ); 46.4 ( $\text{C}_4$ ); 41.8 (2C,  $\text{C}_6$  and  $\text{C}_{10}$ ); 39.2 ( $\text{C}_7$ ); 32.6 ( $\text{C}_3$  and  $\text{C}_5$ ); 29.8 ( $\text{C}_8$ ); 29.6 (2C,  $\text{C}_{11}$  and  $\text{C}_{12}$ ).

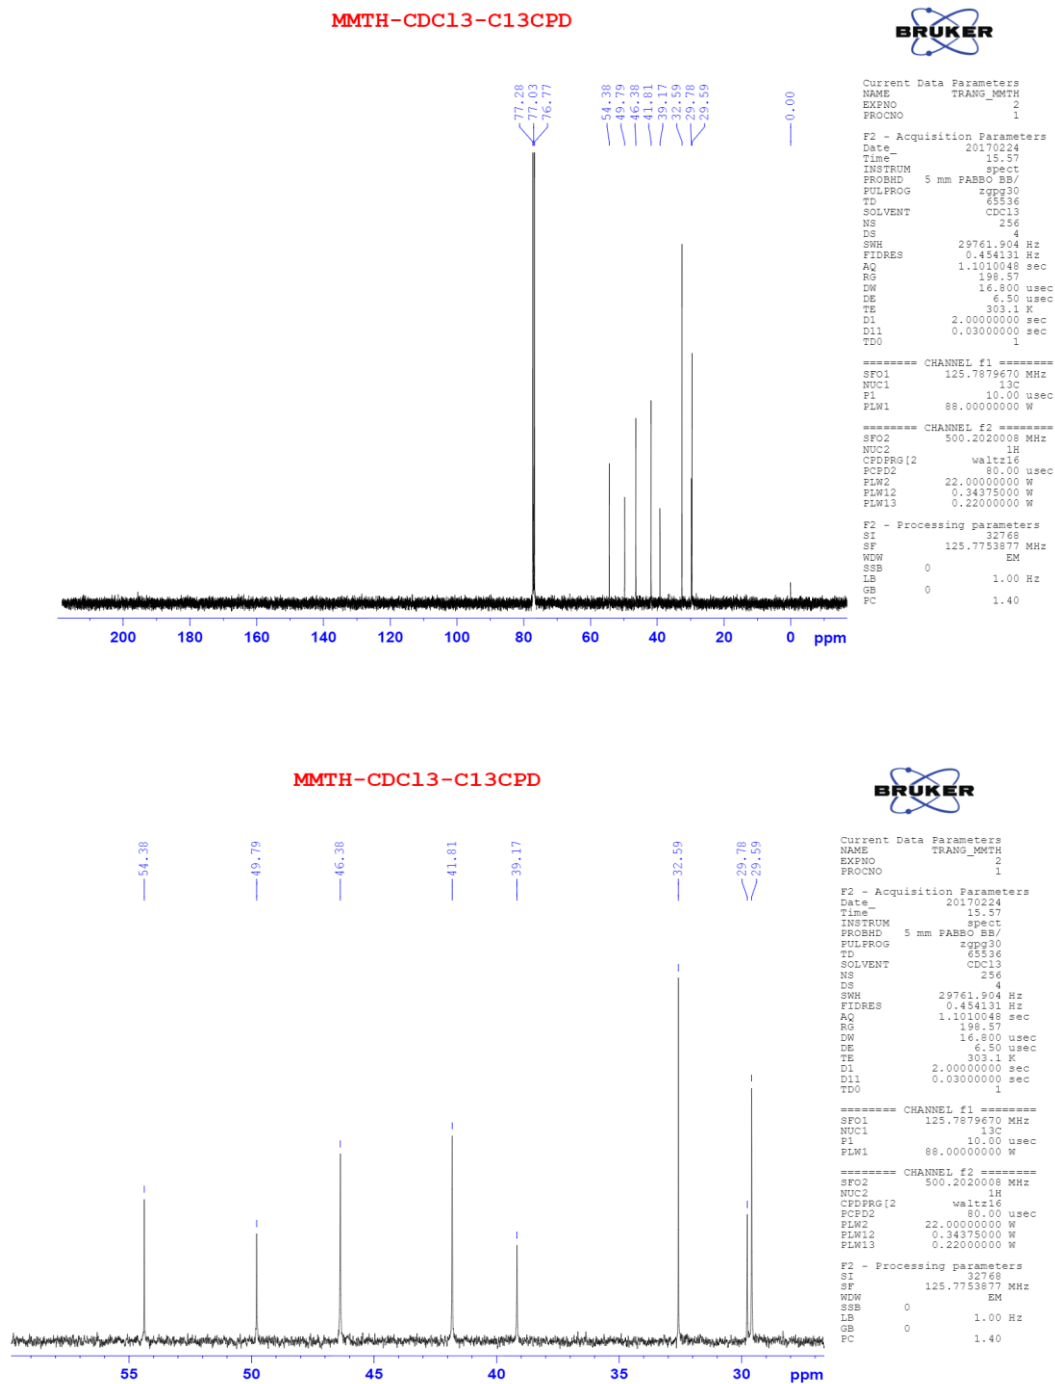

**Figure S8.**  $^{13}\text{C}$ -NMR spectrum of Memantine Hydrochloride

### 3. THE SAFETY STUDIES

Sample preparation:

Sample 1. 1 mL 1,3-dimethyl-adamantane

Sample A. 1.24 ml 1-3 dimethyl-adamantane and 2.25 ml formamide

Sample B. 1.24 mL 1-3 dimethyl-adamantane and 2.52 mL acid nitric

Sample C. 1.24 ml 1-3 dimethyl-adamantane, 2.25 ml formamide and 2.52 mL acid nitric

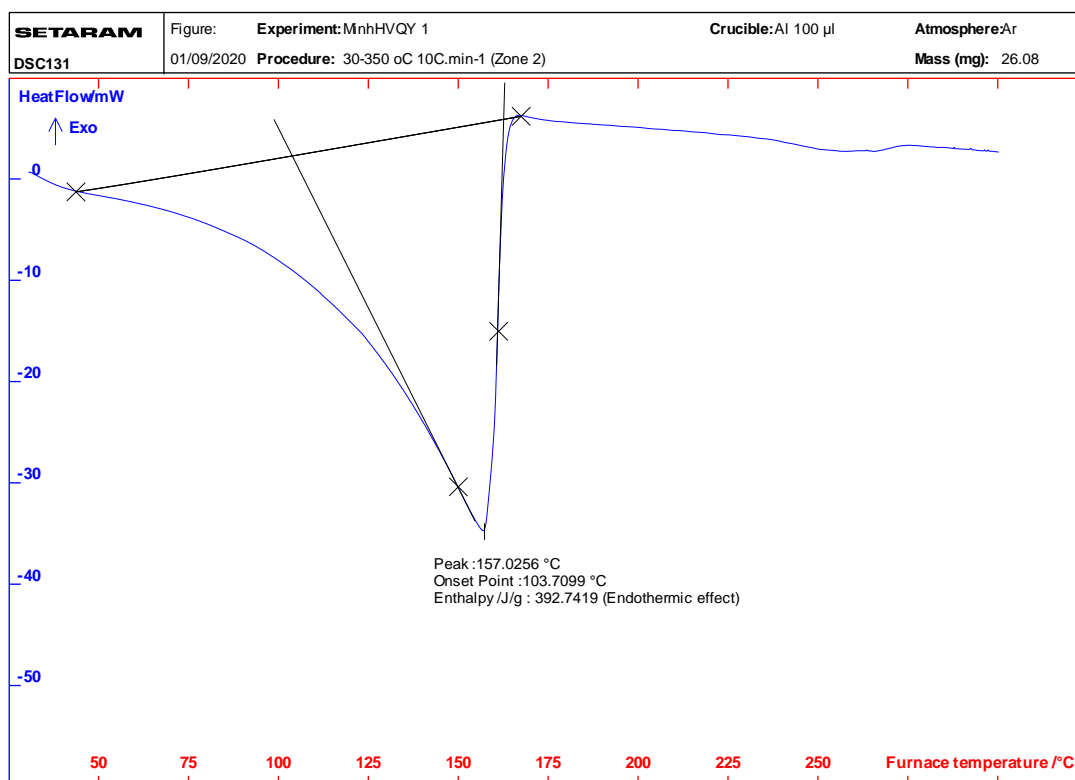

**Figure S9.**The DSC measurement result of sample 1

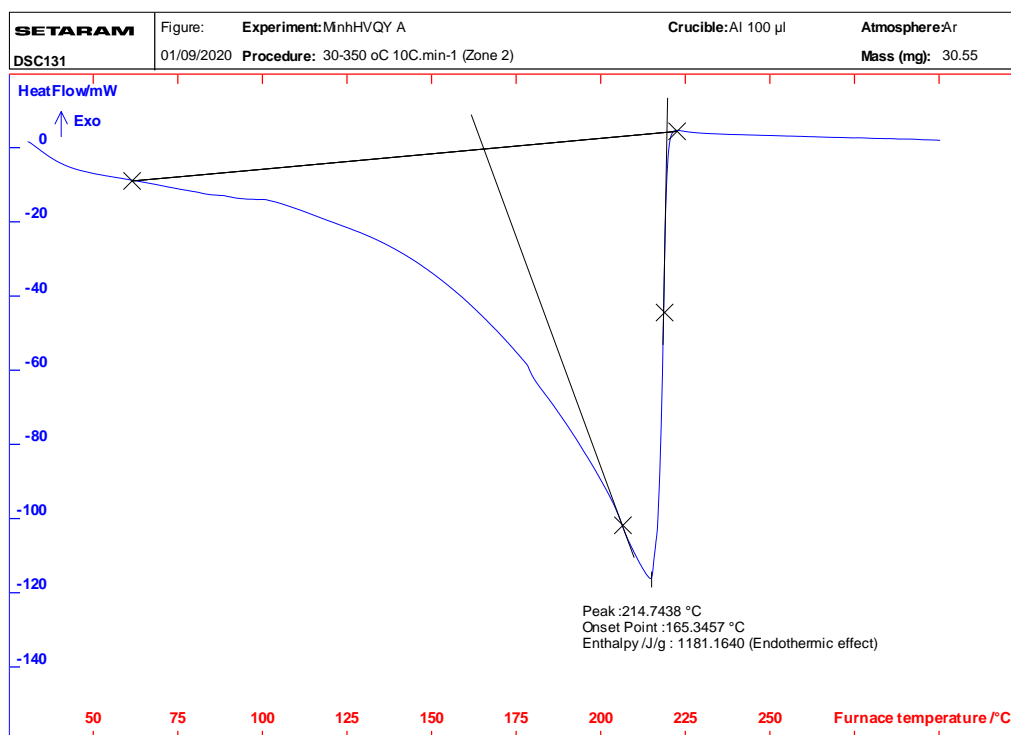

**Figure S10.**The DSC measurement result of sample A

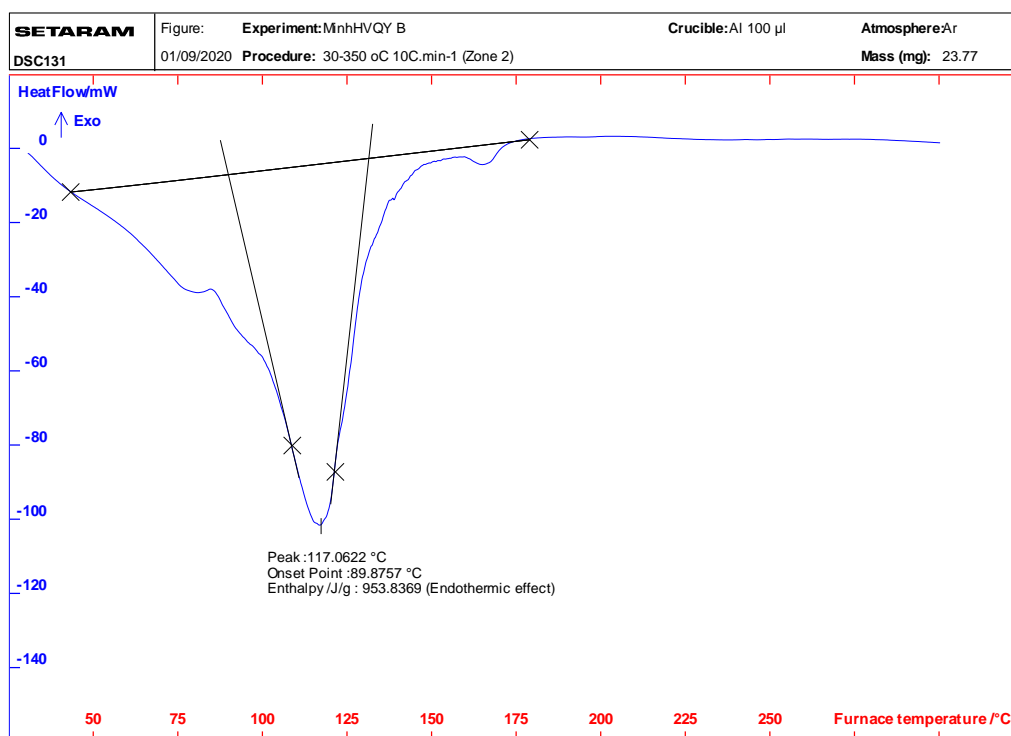

**Figure S11.**The DSC measurement result of sample B

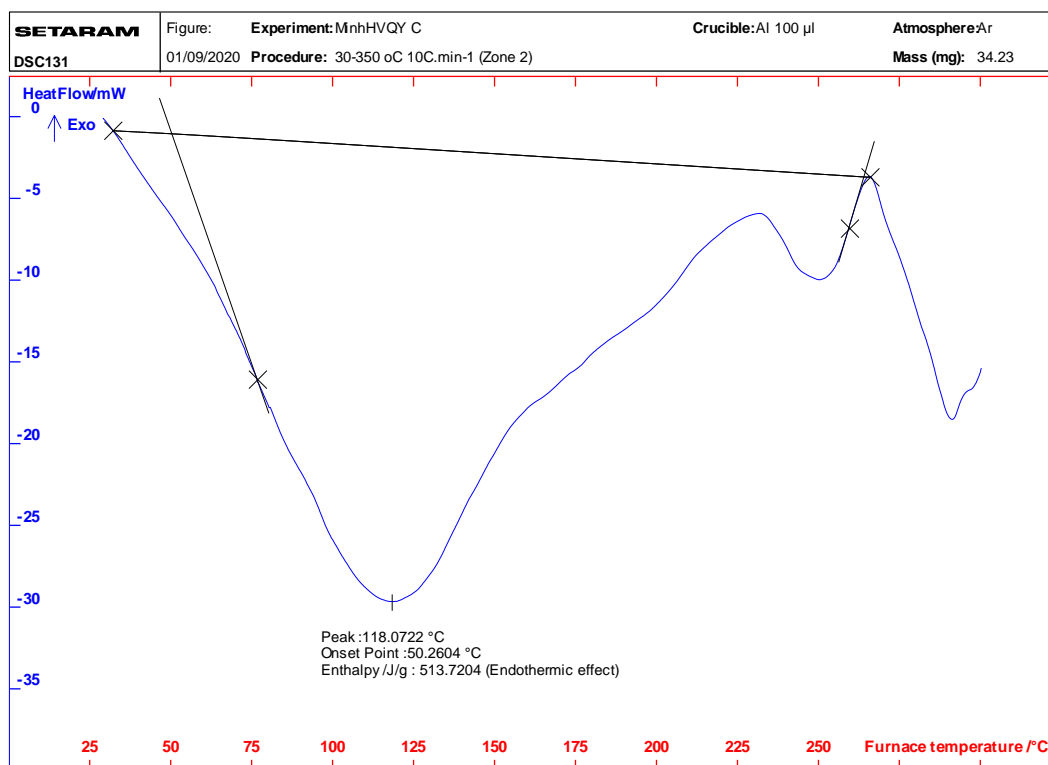

**Figure S12.**The DSC measurement result of sample C

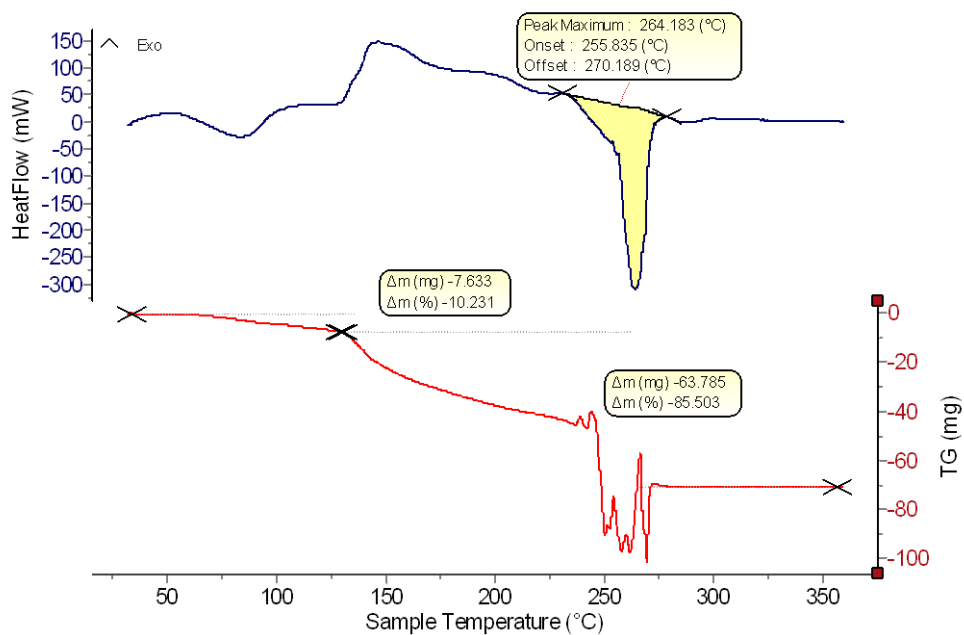

**Figure S13.**The ARC study of sample C

⇒ **Conclusion:**

The DSC results showed that, when heating in the area from room temperature to 300 °C, only the endothermic effect corresponding to the evaporation of the liquid is accompanied by decomposition at high temperature, no effect appears exothermic decomposition.

The ARC study of sample C also illustrated that this reaction still has an exothermic effect at 150 °C but decomposes more smoothly.

Therefore, it can be concluded that it is safe and not explosive.
